# Supplementary material for: An amplified electrochemiluminescent aptasensor using Au nanoparticles capped by 3,4,9,10-perylene tetracarboxylic acid-thiosemicarbazide functionalized C60 nanocomposites as a signal enhancement tag
Source: Royal Society of Chemistry journal article supplement (doi:10.1039/c4nr05918b), 2014-12-11
Supplement: c4nr05918b1.pdf [file c4nr05918b1.pdf]

1                   **Electronic Supplementary Information for**  
2       **Amplified electrochemiluminescent aptasensor using Au**  
3       **nanoparticles capped 3,4,9,10-perylene tetracarboxylic acid-**  
4       **thiosemicarbazide functionalized C<sub>60</sub> nanocomposites as**  
5                   **signal enhancement**

6                   Meng-Nan Ma, Xia Zhang, Ying Zhuo\*, Ya-Qin Chai \*, Ruo Yuan

7       *Key Laboratory of Luminescence and Real-Time Analytical Chemistry (Southwest*  
8       *University), Ministry of Education, College of Chemistry and Chemical Engineering,*  
9       *Southwest University, Chongqing 400715.*

10   **The preparation of the comparison of the different nanomaterials and their**  
11   **corresponding UV-vis absorption spectroscopy (UV) characterization**

12   **Preparation of TSC-PTC nanocomplexes**

13   Briefly, 100  $\mu$ L of freshly prepared EDC/NHS solution (40 mM EDC, 10 mM NHS)  
14   was added into 300  $\mu$ L PTCA solution (1mg/mL) for 30 min to activate the carboxyl  
15   group. Afterwards, 300  $\mu$ L of 10 mM TSC was added for 12 h under stirring,  
16   followed by centrifuging and washing twice by distilled water. The prepared material  
17   was dispersed in distilled water and stored at 4°C when not used.

18   **Preparation of AuNPs/TSC-PTC/C<sub>60</sub>NPs nanocomplexes**

19   Firstly, the PTCA functionalized C<sub>60</sub>NPs was synthesized with the next steps. 300  $\mu$ L  
20   PTCA solution (1mg/mL) and 650  $\mu$ L C<sub>60</sub>NPs (1mg/mL) were mixed together with

---

\* Corresponding authors at: Tel: +86-023-68252277; Fax: +86-23-68253172  
E-mail addresses: yingzhuo@swu.edu.cn, yqchai@swu.edu.cn

21 stirring for 12 h and then the resultant mixture was centrifuged and washed for several  
22 times by distilled water. Afterwards, 100  $\mu$ L of freshly prepared EDC/NHS solution  
23 (40 mM EDC, 10 mM NHS) was added into the above C<sub>60</sub>NPs/PTCA solution for 30  
24 min to activate the carboxyl group. Subsequently, 300  $\mu$ L of 10 mM TSC was added  
25 for 12 h under stirring, followed by centrifuging and washing twice by distilled water.  
26 Finally, 150  $\mu$ L prepared AuNPs solution was added into the mixture for about 12 h  
27 with stirring. In order to remove the excess AuNPs, the resulting mixture was also  
28 washed for several times by distilled water. The prepared nanocomplexes was stored  
29 at 4°C until use.

### 30 **UV-vis absorption spectroscopy (UV) characterization**

31 UV was used to characterize the successful preparation of different nanomaterials  
32 (Fig. S1). Firstly, from the Fig. S1 A, we could see that C<sub>60</sub>NPs had three strong  
33 absorption at 209, 265, and 345 nm, respectively (curve a), which is in accordance  
34 with the reported results.<sup>1</sup> PTCA had two characteristic absorption peaks at 470 and  
35 551 nm (curve b). After the PTCA/C<sub>60</sub>NPs nanocomplexes was formed, the  
36 absorption of C<sub>60</sub>NPs showed a red-shift trend and some characteristic absorption  
37 peaks of PTCA were missing (curve c), which demonstrated that PTCA/C<sub>60</sub>NPs  
38 nanocomplexes was successfully synthesized via  $\pi$ - $\pi$  stacking interactions.  
39 Simultaneously, as shown in Fig. S1 B, TSC had a characteristic absorption peak at  
40 235 nm (curve a) and the characteristic absorption peaks of TSC-PTC nanocomplexes  
41 were observed at 219, 484 and 549 nm, respectively (curve c), suggesting that the  
42 successful preparation of TSC-PTC nanocomplexes. Finally, as can be seen in Fig. S1

43 C, AuNPs had a characteristic absorption peak at 521 nm (curve a). Comparing with  
 44 the individual nanomaterial, the spectrum of AuNPs/TSC-PTC/C<sub>60</sub>NPs  
 45 nanocomplexes contained the characteristic absorption peaks of each individual  
 46 nanomaterial with a shift (curve b), which revealed that AuNPs/TSC-PTC/C<sub>60</sub>NPs  
 47 nanocomplexes was successfully prepared.

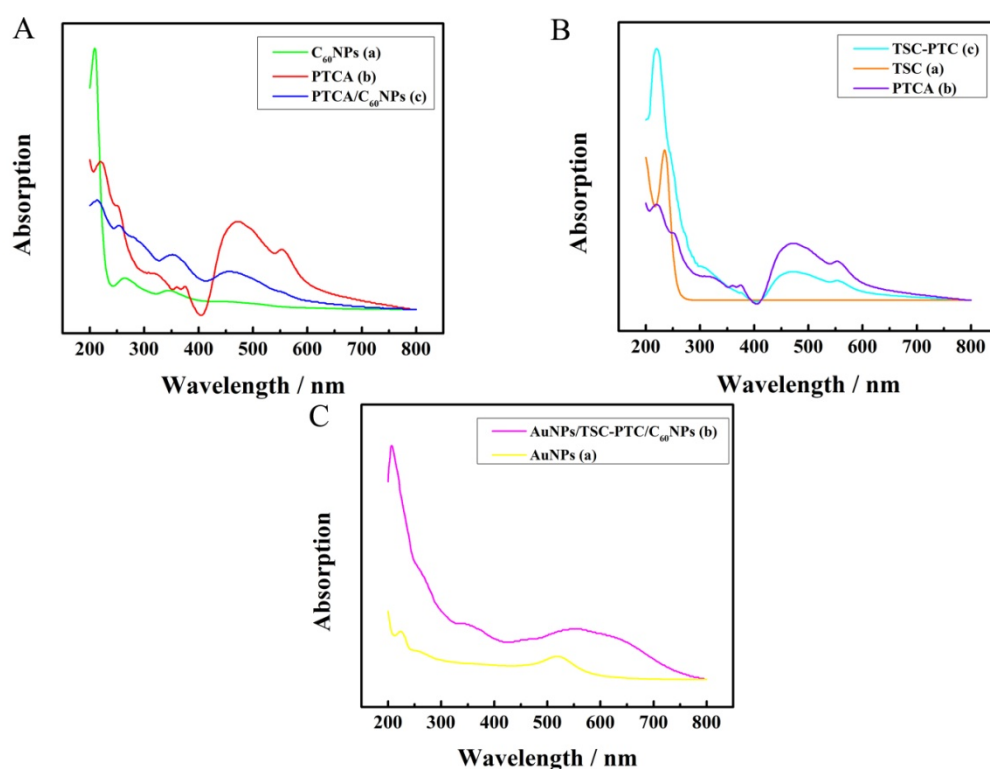

48  
 49 **Fig. S1** UV-vis absorption spectra of A: (a) C<sub>60</sub>NPs, (b) PTCA, (c) PTCA/C<sub>60</sub>NPs, B:  
 50 (a) TSC, (b) PTCA, (c) TSC-PTC, and C: (a) AuNPs, (b) AuNPs/TSC-PTC/C<sub>60</sub>NPs

56 **Table S1** Comparison of the TB detection with different ECL systems.

| ECL system                                                                       | Co-reactant                                 | Linear range   | LOD     | Sensitivity | Ref.         |
|----------------------------------------------------------------------------------|---------------------------------------------|----------------|---------|-------------|--------------|
| Fe <sub>3</sub> O <sub>4</sub> @CdSe-S <sub>2</sub> O <sub>8</sub> <sup>2-</sup> | S <sub>2</sub> O <sub>8</sub> <sup>2-</sup> | 1.0 pM-5.0 nM  | 0.12 pM | 454.97      | 2            |
| luminol-AuNPs                                                                    | H <sub>2</sub> O <sub>2</sub>               | 5.0 pM-50 nM   | 1.7 pM  | 287.00      | 3            |
| CdTe/ZnS-dGMP                                                                    | O <sub>2</sub>                              | 1.0 nM-150 nM  | 0.10 nM | —           | 4            |
| S <sub>2</sub> O <sub>8</sub> <sup>2-</sup> -O <sub>2</sub>                      | TSC-PTC                                     | 0.010 pM-10 nM | 3.3 fM  | 1919.20     | Present work |

57

## 58 References

- 59 [1] A. Graja, I. Olejniczak, A. Bogucki, D. Bonifazi and F. Diederich,
- 60 *Chem. Phys.*, 2004, **300**, 227 – 232.
- 61 [2] G. F. Jie, J. X. Yuan, *Anal. Chem.*, 2012, **84**, 2811–2817.
- 62 [3] L. Fang, C. Hua, *Biosens. Bioelectron.*, 2013, **39**, 261-267.
- 63 [4] P. Zhao, L. F. Zhou, Z. Nie, X. H. Xu, W. Li, Y. Huang, K. Y. He, S. Z. Yao, *Anal.*
- 64 *Chem.*, 2013, **85**, 6279–6286.
